# Supplementary material
Source: ML conference proceedings conference paper supplement (https://openaccess.thecvf.com/content/cvpr_2015/html/Meyer_Phase-Based_Frame_Interpolation_2015_CVPR_paper.html)
Supplement: Supplementary file 1 [file Meyer_Phase-Based_Frame_Interpolation_2015_CVPR_supplemental.pdf]

# Phase-Based Frame Interpolation for Video

## Supplementary Material

Simone Meyer<sup>1</sup>   Oliver Wang<sup>2</sup>   Henning Zimmer<sup>2</sup>   Max Grosse<sup>2</sup>   Alexander Sorkine-Hornung<sup>2</sup>  
<sup>1</sup>ETH Zurich   <sup>2</sup>Disney Research Zurich

### SSIM Error Measurements

In Figure 1 we report error measures using the perceptually motivated structural similarity (SSIM) measure. This complements the sum of squared distances (SSD) error measures reported in Figure 8 (right) in the paper.

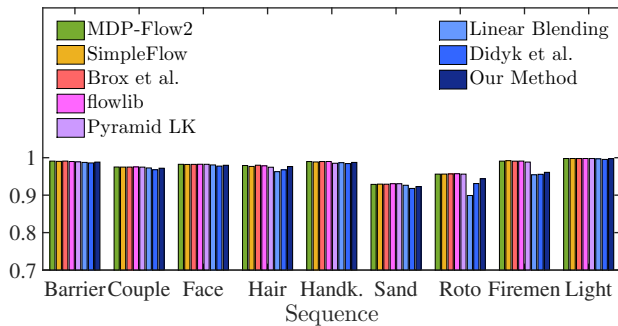

Figure 1: Error measurements (SSIM) for the different sequences shown in Figure 2. Note that a higher value is better with 1 being the maximum.

### Input Images

In Figure 2 we show example input images from the sequences used to compute the error measures in Figure 1 as well as in Figure 8 (right) in the paper.

### Middlebury Dataset

In Figure 3 we compare our phase-based method to optical flow on the Middlebury dataset<sup>1</sup>. In order to increase the visual quality of our results, we ignored the high pass residual in these examples, which, however, leads to larger numerical errors compared to the ground truth.

### References

- [1] T. Brox, A. Bruhn, N. Papenber, and J. Weickert. High accuracy optical flow estimation based on a theory for warping. In *ECCV*, pages 25–36, 2004. 2

<sup>1</sup><http://vision.middlebury.edu/flow/>

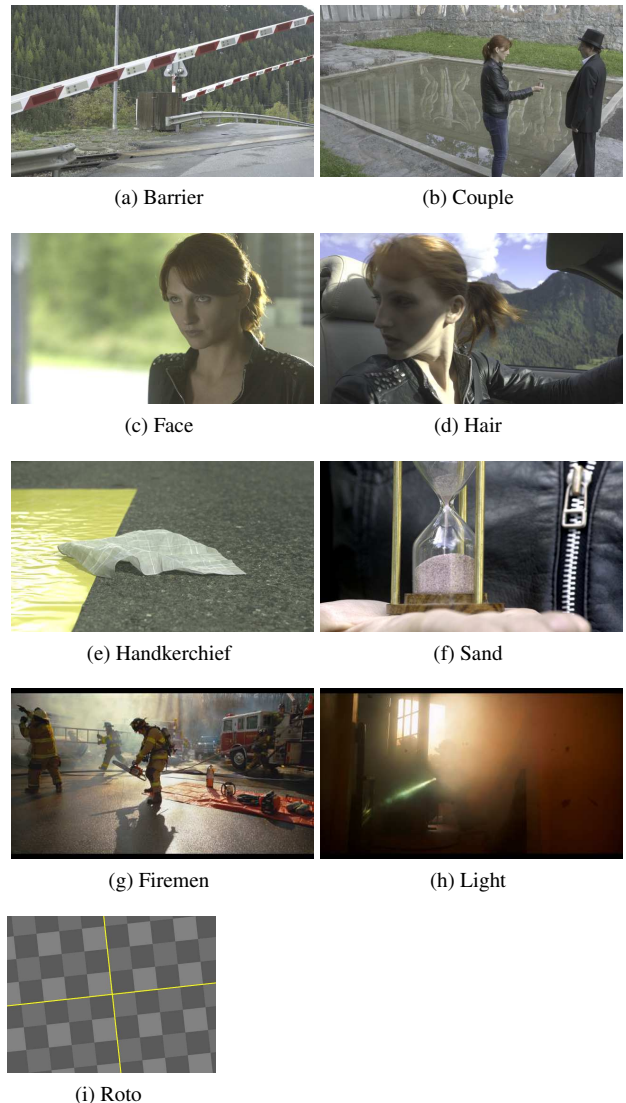

Figure 2: The sequences used for the error measurements in Figure 1 as well as in Figure 8 (right) in the paper.

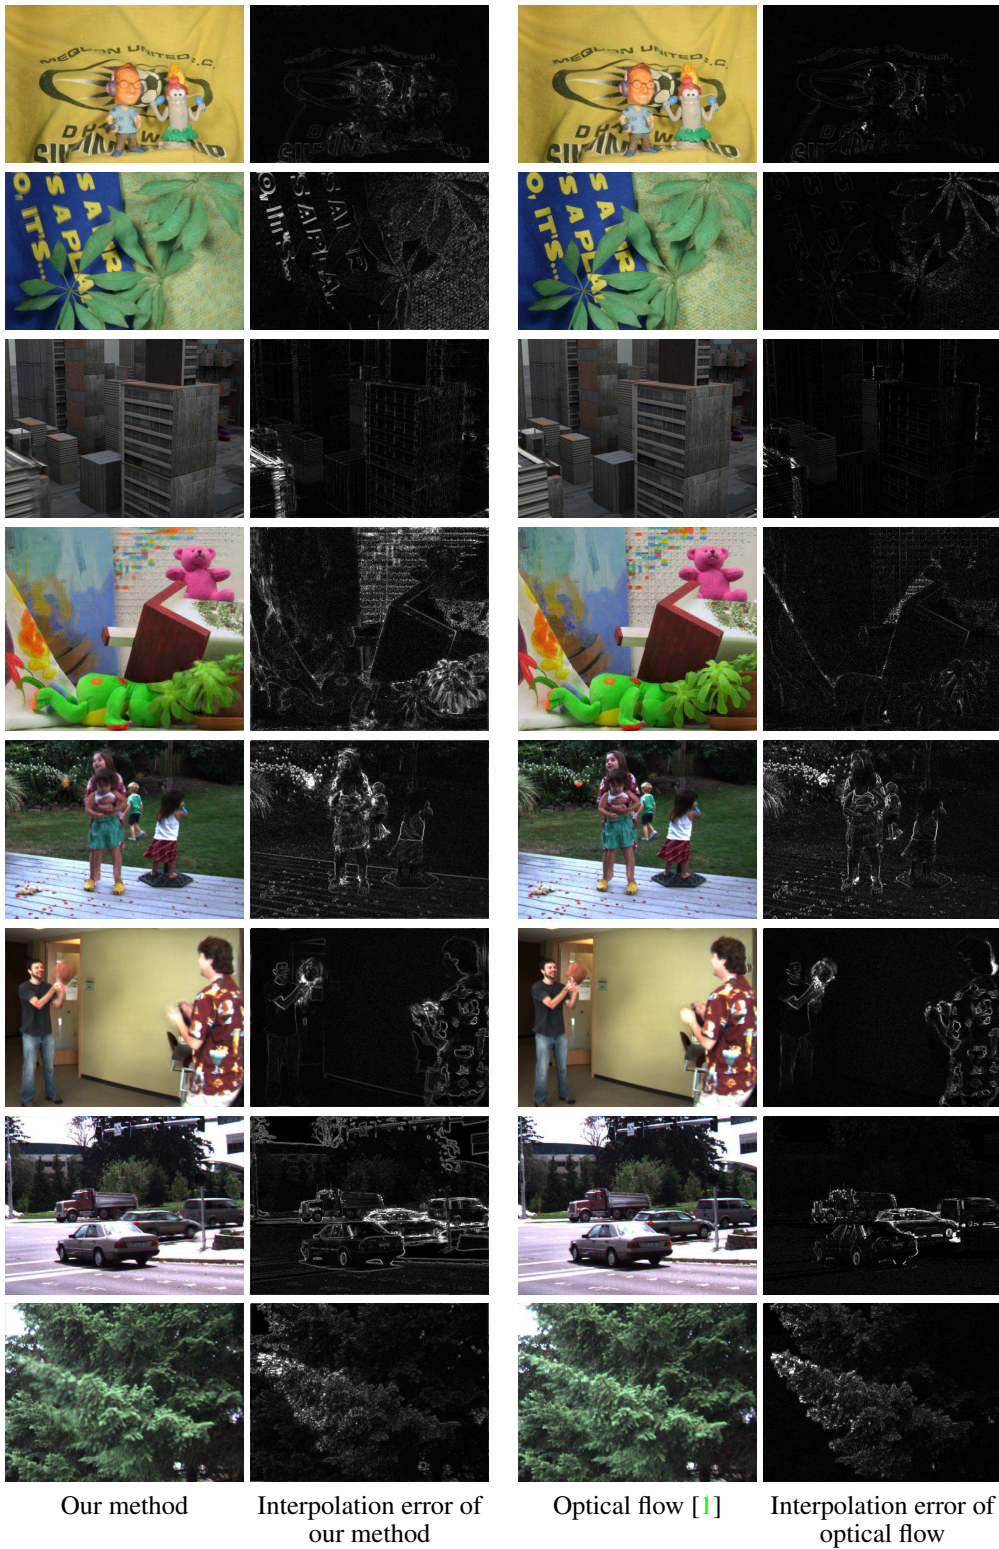

Figure 3: Comparison between our phase-based method and optical flow regarding the interpolation results and errors of various images from the Middlebury dataset (<http://vision.middlebury.edu/flow/>).
